# Supplementary material for: Effect of lubricant viscosity on the self-healing properties and electrically driven sliding of droplets on anisotropic slippery surfaces
Source: Royal Society of Chemistry journal article supplement (doi:10.1039/c7ta10439a), 2017-12-21
Supplement: c7ta10439a4.pdf [file c7ta10439a4.pdf]

## Effect of Lubricant Viscosity on the Self-Healing Properties and Electrically Driven Sliding of Droplets on Anisotropic Slippery Surfaces

Zubin Wang,<sup>a</sup> Liping Heng<sup>\*a</sup> and Lei Jiang<sup>a</sup>

a. Key Laboratory of Bio-Inspired Smart Interfacial Science and Technology of Ministry of Education, Beijing Key Laboratory of Bio-Inspired Energy Materials and Devices, School of Chemistry, Beihang University, Beijing 100191, China. E-mail: [henglp@iccas.ac.cn](mailto:henglp@iccas.ac.cn); Fax: +86 10-82627566

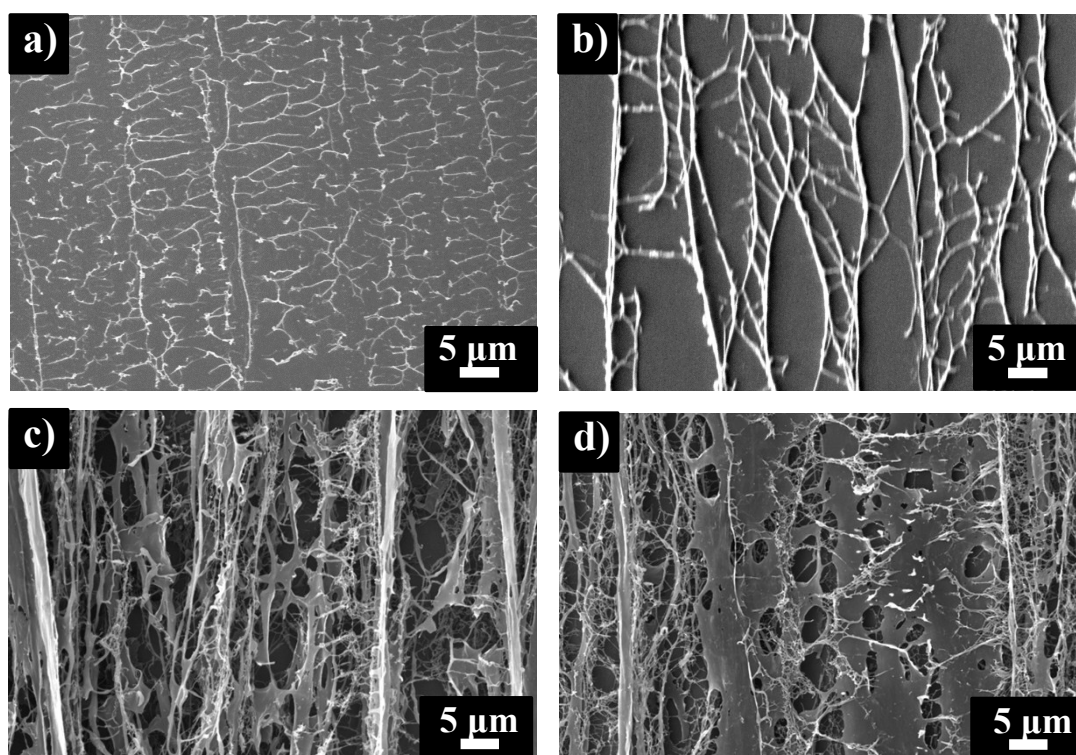

**Fig. S1** SEM images of PCDTPT films prepared by directional freeze-drying using 1,2-dichlorobenzene solutions of PCDTPT at different concentrations: (a) 1 mg mL<sup>-1</sup>, (b) 2 mg mL<sup>-1</sup>, (c) 4 mg mL<sup>-1</sup>, and (d) 6 mg mL<sup>-1</sup>.

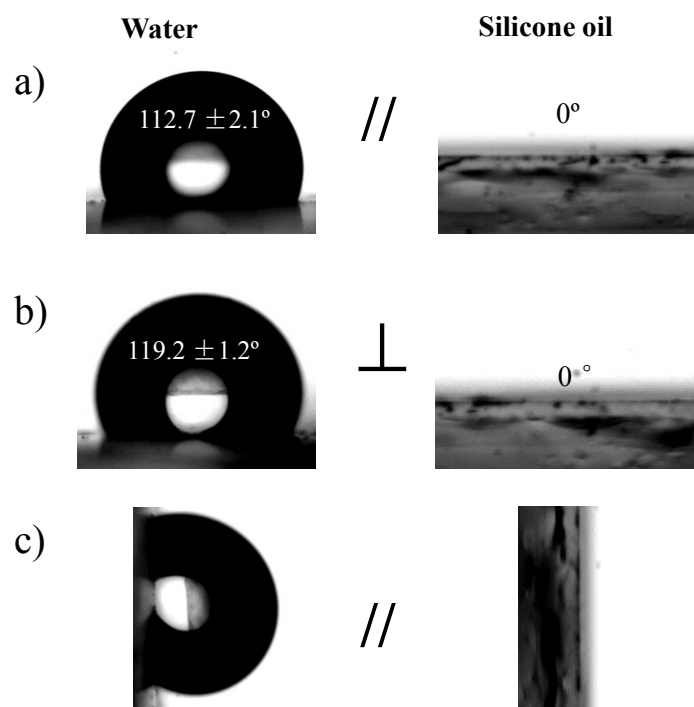

**Fig. S2** Anisotropic CA images of liquid droplets on the PCDTPT directional fiber films without a coating of silicone oil. (a) CAs of water and silicone oil droplets parallel to the fiber direction ( $//$ ). (b) CAs of water and silicone oil droplets in the perpendicular direction ( $\perp$ ). (c) No sliding is observed on the directional porous PCDTPT films without a coating of silicone oil, even when the surfaces are tilted  $90.0^\circ$  in the parallel direction ( $//$ ). Silicone oil possesses a low surface tension and completely spread on the film surface. The viscosity of silicone oil used here is 2 cSt.

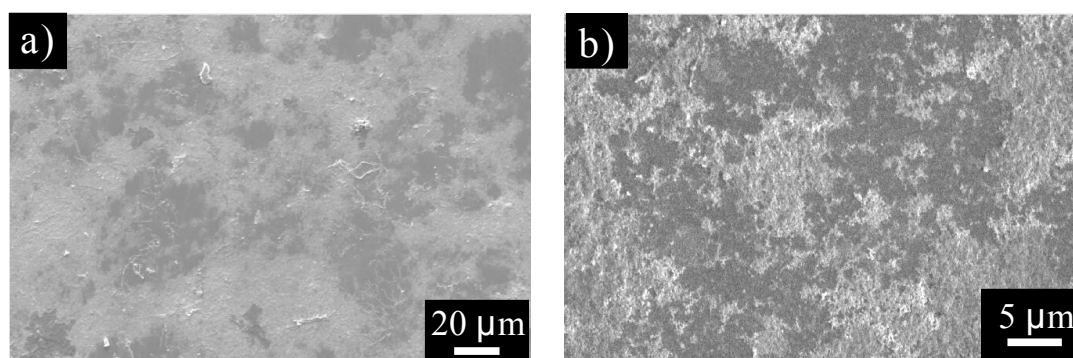

**Fig. S3** SEM images of PCDTPT slippery surfaces destroyed by applying a high voltage. (a) Low-magnification image, (b) high-magnification image. The results show that the directional porous fiber structure is broken.

**Table S1.** The surface tension and puncture voltages of silicone oils with various viscosities.

| Viscosity (cSt) | Surface tension (mN m <sup>-1</sup> ) | Puncture voltage (kV) |
|-----------------|---------------------------------------|-----------------------|
| 2               | 28.09 ± 0.43                          | 31.4                  |
| 20              | 29.73 ± 0.26                          | 38.5                  |
| 40              | 29.87 ± 0.33                          | 46.6                  |
| 60              | 30.11 ± 0.17                          | 51.3                  |
| 80              | 30.46 ± 0.20                          | 58.5                  |
| 100             | 31.13 ± 0.25                          | 67.6                  |

**Table S2.** Comparison of the spin-coating speed for the surfaces filled with same-thickness silicone oils.

| Viscosity (cSt) | Rational speed (rpm) | Thickness (μm) |
|-----------------|----------------------|----------------|
| 2               | 2000                 | 5.67           |
| 20              | 3000                 | 5.67           |
| 40              | 3000                 | 5.63           |
| 60              | 4000                 | 5.63           |
| 80              | 4000                 | 5.72           |
| 100             | 5000                 | 5.68           |

**Table S3.** Anisotropic CAs and SAs of a water droplet on the directional porous PCDTPT film filled with silicone oils with different viscosities.

| Viscosity (cSt) | CA //        | CA ⊥         | SA //      | SA ⊥        |
|-----------------|--------------|--------------|------------|-------------|
| 2               | 103.4 ± 1.1° | 108.3 ± 1.5° | 2.3 ± 0.8° | 5.9 ± 1.5°  |
| 20              | 104.3 ± 2.1° | 109.1 ± 1.3° | 2.7 ± 1.1° | 6.5 ± 1.9°  |
| 40              | 102.5 ± 1.7° | 108.7 ± 1.5° | 3.3 ± 2.1° | 7.4 ± 1.4°  |
| 60              | 102.9 ± 1.5° | 109.4 ± 2.1° | 3.7 ± 1.3° | 7.9 ± 2.5°  |
| 80              | 103.3 ± 2.3° | 108.6 ± 1.4° | 4.3 ± 1.9° | 9.1 ± 1.3°  |
| 100             | 104.1 ± 1.4° | 110.0 ± 1.7° | 4.6 ± 1.5° | 10.3 ± 2.2° |

**Table S4.** Relationship between silicone oil spin-coating speed and self-healing ability. After the PCDTPT films are scratched, increasing the spin-coating speed will increase the SAs and decrease the self-healing ability. The viscosity of the silicone oil used here is 2 cSt.

| Rotational speed (rpm) | SA (//) before scratching | SA (//) after scratching |
|------------------------|---------------------------|--------------------------|
| 1000                   | $2.0 \pm 1.2^\circ$       | $2.0 \pm 1.4^\circ$      |
| 2000                   | $2.3 \pm 0.8^\circ$       | $2.5 \pm 0.6^\circ$      |
| 3000                   | $28.4 \pm 3.5^\circ$      | $28.6 \pm 3.1^\circ$     |
| 4000                   | $42.2 \pm 3.8^\circ$      | $43.1 \pm 3.4^\circ$     |
| 5000                   | $58.5 \pm 3.1^\circ$      | $71.2 \pm 3.6^\circ$     |

**Table S5.** CAs of silicone oils (2  $\mu$ L) with different viscosities on bare glass substrates. The CAs slightly increased with increasing silicone oil viscosity.

| Viscosity (cSt) | CA ( $\beta$ )       |
|-----------------|----------------------|
| 2               | $11.2 \pm 0.5^\circ$ |
| 20              | $12.4 \pm 0.3^\circ$ |
| 40              | $14.1 \pm 0.6^\circ$ |
| 60              | $15.8 \pm 0.4^\circ$ |
| 80              | $17.6 \pm 0.2^\circ$ |
| 100             | $20.4 \pm 0.4^\circ$ |

**Table S6.** Anisotropic SAs of water droplets on the directional PCDTPT films filled with silicone oils with different viscosities when a copper wire hinders the droplet sliding (no applied voltage). The results show that the SAs in both directions are larger with the copper wire than without it.

| Viscosity (cSt) | SA //                | SA $\perp$           |
|-----------------|----------------------|----------------------|
| 2               | $11.5 \pm 2.9^\circ$ | $22.7 \pm 2.3^\circ$ |
| 20              | $12.6 \pm 1.5^\circ$ | $23.6 \pm 1.9^\circ$ |
| 40              | $13.8 \pm 1.3^\circ$ | $24.9 \pm 1.6^\circ$ |
| 60              | $14.6 \pm 2.1^\circ$ | $26.1 \pm 2.5^\circ$ |
| 80              | $15.7 \pm 3.1^\circ$ | $27.0 \pm 2.6^\circ$ |
| 100             | $17.1 \pm 2.4^\circ$ | $28.2 \pm 2.6^\circ$ |

**Movie S1.** The self-healing process of PCDTPT slippery surface infused with the 2 cSt silicone oil after physical damage when the spin-coating speed is 2000 rpm.

**Movie S2.** When the spin-coating speed is 5000 rpm, the PCDTPT slippery surface infused with the 2cSt silicone oil show no self-healing property after physical damage.

**Movie S3.** Electrically controlled water droplet sliding on the slippery surfaces infused with silicone oil of 40 cSt.
